# Supplementary material for: Effect of BET Missense Mutations on Bromodomain Function, Inhibitor Binding and Stability
Source: PubMed Central journal article supplement (PMC4942050; doi:10.1371/journal.pone.0159180), 2016-07-12

## (A) BRD2(1)

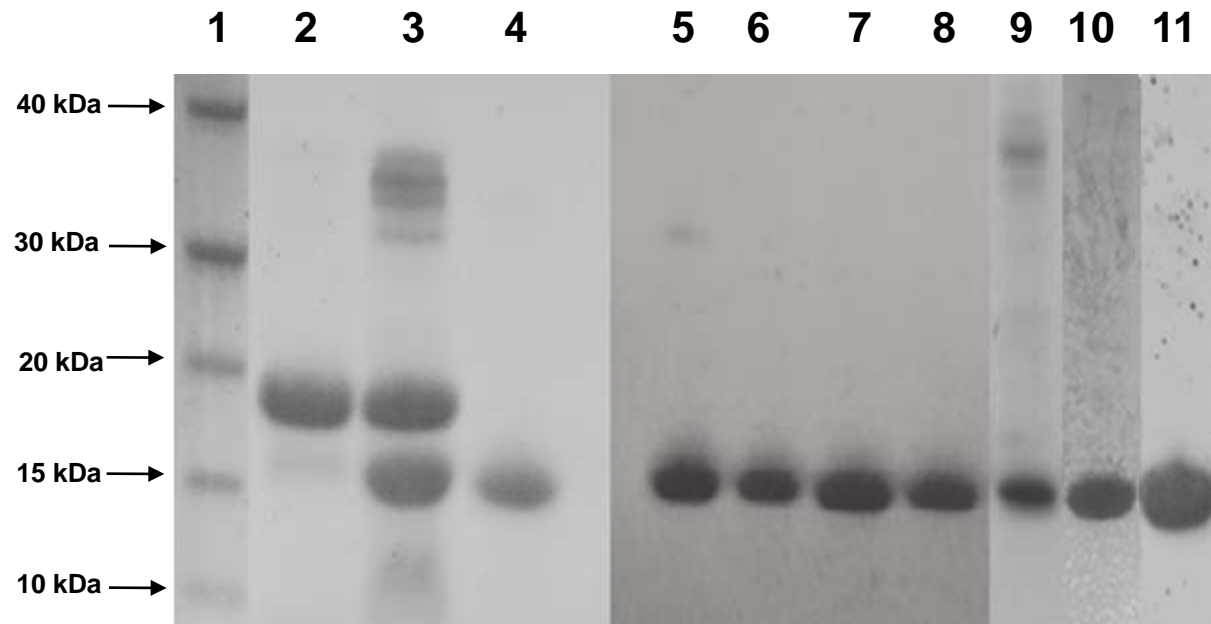

## (B) BRD4(1)

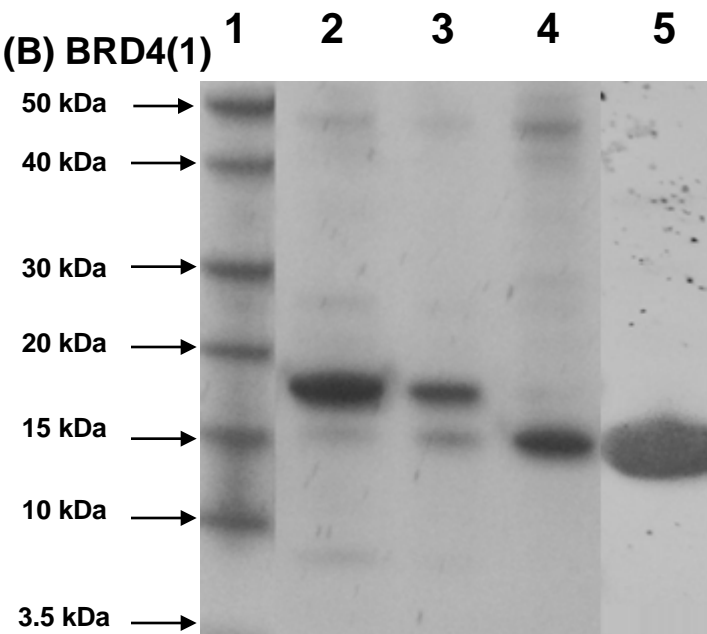

Supplement: pone.0159180.s007.pdf [file pone.0159180.s007.pdf]
