# Supplementary material for: Effect of BET Missense Mutations on Bromodomain Function, Inhibitor Binding and Stability
Source: PubMed Central journal article supplement (PMC4942050; doi:10.1371/journal.pone.0159180), 2016-07-12
Supplement: pone.0159180.s009.pdf [file pone.0159180.s009.pdf]

**S1Table.** Data collection and refinement statistics

| PDB ID                                    | 5HEL                              | 5HEM                              | 5HEN               | 5HFQ                              | 5HFR                              |
|-------------------------------------------|-----------------------------------|-----------------------------------|--------------------|-----------------------------------|-----------------------------------|
| Protein / mutant                          | BRD2(1) / Y153H                   | BRD2(1) / D161Y                   | BRD2(1) / R100L    | BRD2(2) / Q443H                   | BRD3(2) / H395R                   |
| Space group                               | P 4 <sub>3</sub> 2 <sub>1</sub> 2 | P 4 <sub>3</sub> 2 <sub>1</sub> 2 | C 1 2 1            | P 2 2 <sub>1</sub> 2 <sub>1</sub> | P 2 <sub>1</sub> 2 2 <sub>1</sub> |
| Cell dimensions:                          |                                   |                                   |                    |                                   |                                   |
| a, b, c (Å)                               | 47.74 47.74 125.79                | 68.73 68.73 113.36                | 115.38 55.76 68.45 | 32.02 52.81 72.31                 | 64.83 92.55 102.95                |
| α, β, γ (deg)                             | 90.00 90.00 90.00                 | 90.00 90.00 90.00                 | 90.00 94.76 90.00  | 90.00 90.00 90.00                 | 90.00 90.00 90.00                 |
| Resolution* (Å)                           | 29.75 (1.45)                      | 29.67 (1.65)                      | 29.44 (1.79)       | 29.28 (1.40)                      | 29.55 (1.70)                      |
| Unique observations*                      | 26847 (3793)                      | 33564 (4733)                      | 40528 (2236)       | 24828 (1130)                      | 68935 (3165)                      |
| Completeness* (%)                         | 99.9 (99.2)                       | 99.7 (99.4)                       | 99.5 (93.5)        | 99.7 (95.8)                       | 99.3 (87.4)                       |
| Redundancy*                               | 13.7 (12.9)                       | 6.0 (4.3)                         | 5.9 (5.5)          | 12.3 (7.8)                        | 12.7 (10.3)                       |
| Rmerge*                                   | 0.044 (0.336)                     | 0.097 (0.373)                     | 0.063 (0.790)      | 0.040 (0.063)                     | 0.234 (2.483)                     |
| I/σI*                                     | 34.2 (9.8)                        | 13.8 (3.8)                        | 14.2 (2.0)         | 48.5 (22.8)                       | 13.0 (2.7)                        |
| <b>Refinement</b>                         |                                   |                                   |                    |                                   |                                   |
| Resolution (Å)                            | 1.45                              | 1.65                              | 1.79               | 1.40                              | 1.70                              |
| R <sub>work</sub> / R <sub>free</sub> (%) | 19.09 / 20.90                     | 16.67 (19.89)                     | 18.08 (22.27)      | 16.68 (18.53)                     | 19.37 (22.09)                     |
| Number of atoms                           |                                   |                                   |                    |                                   |                                   |
| (protein/other/water)                     | 989 / 12 / 10                     | 1982 / 29 / 214                   | 2713 / 12 / 148    | 920 / 0 / 169                     | 3634 / 20 / 402                   |
| B-factors (Å <sup>2</sup> )               |                                   |                                   |                    |                                   |                                   |
| (protein/other/water)                     | 18.04/26.93/29.27                 | 15.52/22.23/24.35                 | 35.84/39.32/38.13  | 9.68/0/22.08                      | 19.38/32.81/28.94                 |
| r.m.s.d bonds (Å)                         | 0.012                             | 0.017                             | 0.021              | 0.009                             | 0.013                             |
| r.m.s.d angles (°)                        | 1.479                             | 1.664                             | 1.902              | 1.306                             | 1.486                             |
| Ramachandran                              |                                   |                                   |                    |                                   |                                   |
| Favoured (%)                              | 100.00                            | 100.00                            | 99.38              | 100.00                            | 98.61                             |
| Allowed (%)                               | 0.00                              | 0.00                              | 0.62               | 0.00                              | 1.39                              |
| Disallowed (%)                            | 0.00                              | 0.00                              | 0.00               | 0.00                              | 0.00                              |

\* Values in parentheses correspond to the highest resolution shell
