# Supplementary material for: Effect of BET Missense Mutations on Bromodomain Function, Inhibitor Binding and Stability
Source: PubMed Central journal article supplement (PMC4942050; doi:10.1371/journal.pone.0159180), 2016-07-12
Supplement: pone.0159180.s010.pdf [file pone.0159180.s010.pdf]

**S2 Table.** Dissociation constants and thermodynamic parameters from isothermal titration calorimetry assays. In all cases proteins were titrated into the ligand solution (reverse titration).

| Comp    | Protein | Mutant     | $K_A$ ( $10^6$ M <sup>-1</sup> ) | $K_D$ (nM)    | N              | $\Delta H$ (kcal/mol) | T $\Delta S$ (kcal/mol) * | $\Delta G$ (kcal/mol) |
|---------|---------|------------|----------------------------------|---------------|----------------|-----------------------|---------------------------|-----------------------|
| JQ1     | BRD2(1) | wt         | 20.9 ± 0.7                       | 47.8 ± 1.6    | 0.875 ± 0.001  | -8.826 ± 0.017        | 0.976                     | -9.802                |
|         | BRD2(1) | D161N      | 14.3 ± 0.8                       | 69.9 ± 3.9    | 0.978 ± 0.002  | -6.877 ± 0.025        | 2.673                     | -9.550                |
|         | BRD2(1) | D161Y      | 57.8 ± 3.0                       | 17.3 ± 0.9    | 1.100 ± 0.001  | -7.356 ± 0.016        | 2.997                     | -10.353               |
|         | BRD2(1) | Y153H      | 18.0 ± 0.8                       | 55.5 ± 2.6    | 0.899 ± 0.002  | -9.689 ± 0.031        | 0.044                     | -20.09                |
|         | BRD2(1) | E140K      | 26.0 ± 0.9                       | 38.5 ± 1.4    | 0.933 ± 0.009  | -7.574 ± 0.015        | 2.330                     | -9.904                |
|         | BRD2(1) | R100L      | 35.8 ± 1.7                       | 27.9 ± 1.3    | 1.090 ± 0.001  | -7.918 ± 0.017        | 2.175                     | -10.093               |
|         | BRD2(2) | wt         | 19.7 ± 1.4                       | 50.8 ± 3.7    | 0.908 ± 0.002  | -4.368 ± 0.019        | 5.331                     | -9.699                |
|         | BRD2(2) | Q443H      | 42.4 ± 3.8                       | 23.6 ± 2.1    | 0.913 ± 0.002  | -5.169 ± 0.002        | 4.985                     | -10.154               |
|         | BRD2(2) | R419W      | 33.4 ± 2.4                       | 29.9 ± 2.2    | 1.100 ± 0.0019 | -3.274 ± 0.011        | 6.714                     | -9.988                |
|         | BRD3(2) | wt         | 42.7 ± 2.4                       | 23.4 ± 1.3    | 0.902 ± 0.001  | -6.930 ± 0.017        | 3.256                     | -10.186               |
|         | BRD3(2) | H395R      | 142.8 ± 8.2                      | 7.0 ± 0.4     | 1.100 ± 0.001  | -6.606 ± 0.011        | 4.265                     | -10.871               |
|         | BRD4(1) | wt         | 55.5 ± 3.7                       | 18.0 ± 1.2    | 0.912 ± 0.001  | -12.020 ± 0.033       | -1.605                    | -10.415               |
|         | BRD4(1) | A89V       | 97.1 ± 8.5                       | 10.3 ± 0.9    | 0.969 ± 0.001  | -11.140 ± 0.033       | -0.423                    | -10.717               |
|         | BRD4(2) | wt         | 55.2 ± 4.6                       | 18.1 ± 1.5    | 0.931 ± 0.001  | -5.844 ± 0.019        | 4.466                     | -10.31                |
| BRD4(2) | A420D   | 22.5 ± 1.9 | 44.4 ± 3.9                       | 0.990 ± 0.003 | -6.530 ± 0.035 | 3.285                 | -9.815                    |                       |

(continued on next page)

S2 Table (continued)

| Comp    | Protein | Mutant    | $K_A$ ( $10^6$ M <sup>-1</sup> ) | $K_D$ (nM)    | N               | $\Delta H$ (kcal/mol) | T $\Delta S$ (kcal/mol) * | $\Delta G$ (kcal/mol) |
|---------|---------|-----------|----------------------------------|---------------|-----------------|-----------------------|---------------------------|-----------------------|
| PFI-1   | BRD2(1) | wt        | 12.4 ± 0.4                       | 80.6 ± 2.9    | 0.924 ± 0.001   | -19.230 ± 0.048       | -9.538                    | -9.692                |
|         | BRD2(1) | D161N     | 4.90 ± 0.1                       | 204.1 ± 6.6   | 0.843 ± 0.002   | -13.670 ± 0.042       | -4.609                    | -9.061                |
|         | BRD2(1) | D161Y     | 16.6 ± 0.7                       | 60.24 ± 2.6   | 1.050 ± 0.001   | -17.000 ± 0.044       | -7.201                    | -9.799                |
|         | BRD2(1) | Y153H     | 7.4 ± 0.3                        | 135.3 ± 4.9   | 1.020 ± 0.002   | -17.400 ± 0.051       | -8.039                    | -9.361                |
|         | BRD2(1) | E140K     | 10.7 ± 0.5                       | 93.5 ± 4.4    | 1.060 ± 0.002   | -14.390 ± 0.048       | -4.870                    | -9.520                |
|         | BRD2(1) | R100L     | 9.2 ± 0.3                        | 108.3 ± 3.4   | 0.950 ± 0.001   | -14.790 ± 0.036       | -5.359                    | -9.431                |
|         | BRD2(2) | wt        | 5.0 ± 0.2                        | 198.8 ± 6.6   | 0.985 ± 0.002   | -8.998 ± 0.027        | -0.008                    | -8.990                |
|         | BRD2(2) | Q443H     | 4.7 ± 0.2                        | 213.7 ± 7.6   | 0.978 ± 0.002   | -9.901 ± 0.036        | -0.936                    | -8.965                |
|         | BRD2(2) | R419W     | 4.2 ± 0.2                        | 238.7 ± 10.7  | 1.100 ± 0.003   | -6.318 ± 0.025        | 2.521                     | -8.839                |
|         | BRD3(2) | wt        | 6.2 ± 0.2                        | 161.0 ± 5.9   | 0.976 ± 0.002   | -10.540 ± 0.034       | -1.403                    | -9.137                |
|         | BRD3(2) | H395R     | 0.70 ± 0.03                      | 1386.0 ± 65.0 | 1.030 ± 0.007   | -3.552 ± 0.032        | 4.235                     | -7.787                |
|         | BRD4(1) | wt        | 17.3 ± 0.8                       | 57.8 ± 2.6    | 0.964 ± 0.002   | -19.750 ± 0.056       | -9.883                    | -9.867                |
|         | BRD4(1) | A89V      | 8.5 ± 0.2                        | 117.1 ± 2.8   | 0.918 ± 0.001   | -18.340 ± 0.038       | -8.875                    | -9.465                |
|         | BRD4(2) | wt        | 2.8 ± 0.1                        | 362.3 ± 17.1  | 1.010 ± 0.004   | -10.130 ± 0.062       | -1.464                    | -8.666                |
| BRD4(2) | A420D   | 3.4 ± 0.2 | 297.6 ± 14.5                     | 0.974 ± 0.004 | -10.260 ± 0.060 | -1.484                | -8.776                    |                       |

\* Assay temperature = 15<sup>o</sup> C, 288.15 K
