# Supplementary material for: Effect of BET Missense Mutations on Bromodomain Function, Inhibitor Binding and Stability
Source: PubMed Central journal article supplement (PMC4942050; doi:10.1371/journal.pone.0159180), 2016-07-12
Supplement: pone.0159180.s011.pdf [file pone.0159180.s011.pdf]

**S3 Table. Structural location and difference in melting temperature and in free energy of urea-induced unfolding of BRDs wild type and mutants**

| Position of the mutation |                  | $\Delta T_m$ ( $^{\circ}\text{C}$ ) | $\Delta\Delta G_2^{\text{H}_2\text{O}}$ (kcal/mol) |                  |
|--------------------------|------------------|-------------------------------------|----------------------------------------------------|------------------|
|                          |                  |                                     | CD ( $[\Theta]_{222}$ )                            | Fluorescence     |
| <b>BRD2(1)</b>           |                  |                                     |                                                    |                  |
| Y153H                    | $\alpha$ B helix | -7.0                                | $-6.49 \pm 0.64$                                   | $-5.31 \pm 0.82$ |
| E140K                    | $\alpha$ B helix | -10.8                               | $-3.48 \pm 0.82$                                   | $-4.53 \pm 0.81$ |
| R100L                    | ZA-loop          | -5.8                                | $-5.22 \pm 0.90$                                   | -                |
| D160N                    | BC-loop          | -5.8                                | $-4.10 \pm 0.82$                                   | $-2.33 \pm 0.91$ |
| D160Y                    | BC-loop          | -9.8                                | $-4.02 \pm 0.76$                                   | $-4.20 \pm 0.79$ |
| D161N                    | BC-loop          | -1.3                                | $-2.21 \pm 0.92$                                   | $-3.02 \pm 0.84$ |
| D161Y                    | BC-loop          | -4.8                                | $-3.38 \pm 0.65$                                   | $-4.66 \pm 0.97$ |
| <b>BRD4(1)</b>           |                  |                                     |                                                    |                  |
| A89V                     | ZA-loop          | 0.1                                 | $0.99 \pm 0.50$                                    | $-0.79 \pm 0.90$ |
| <b>BRD2(2)</b>           |                  |                                     |                                                    |                  |
| Q443H                    | $\alpha$ C helix | -3.0                                | $0.89 \pm 0.50$                                    | $1.68 \pm 0.40$  |
| R419W                    | $\alpha$ B helix | -8.0                                | $0.02 \pm 0.48$                                    | $-0.60 \pm 0.38$ |
| <b>BRD3(2)</b>           |                  |                                     |                                                    |                  |
| H395R                    | BC-loop          | -2.6                                | $2.03 \pm 0.63$                                    | $1.12 \pm 0.54$  |
| <b>BRD4(2)</b>           |                  |                                     |                                                    |                  |
| A420D                    | $\alpha$ B helix | -3.0                                | $0.44 \pm 0.48$                                    | $4.93 \pm 0.38$  |
