# Supplementary material for: Effect of BET Missense Mutations on Bromodomain Function, Inhibitor Binding and Stability
Source: PubMed Central journal article supplement (PMC4942050; doi:10.1371/journal.pone.0159180), 2016-07-12
Supplement: pone.0159180.s012.pdf [file pone.0159180.s012.pdf]

**S4 Table. List of oligonucleotides used for site-directed mutagenesis**

---

| <b>Mutant</b>  | <b>Primer sequences (5' to 3')</b>         |
|----------------|--------------------------------------------|
| <b>BRD2(1)</b> |                                            |
| R100L FW       | GTG GCC ATT TCT CCA GCC GGT GGA T          |
| R100L REV      | ATC CAC CGG CTG GAG AAA TGG CCA C          |
| E140K FW       | GGG CGG CCT CTA AAT GCA TGC AGG            |
| E140K REV      | CCT GCA TGC ATT TAG AGG CCG CCC            |
| Y153H FW       | GTT TAC GAA TTG TCA TAT CTA TAA CAA ACC G  |
| Y153H REV      | CGG TTT GTT ATA GAT ATG ACA ATT CGT AAA C  |
| D160N FW       | TAA CAA ACC GAC CAA TGA TAT CGT CTT GAT GG |
| D160N REV      | CCA TCA AGA CGA TAT CAT TGG TCG GTT TGT TA |
| D160YFW        | TAA CAA ACC GAC CTA TGA TAT CGT CTT GAT GG |
| D160Y REV      | CCA TCA AGA CGA TAT CAT AGG TCG GTT TGT TA |
| D161N FW       | CAA ACC GAC CGA TAA TAT CGT CTT GAT GG     |
| D161N REV      | CCA TCA AGA CGA TAT TAT CGG TCG GTT TG     |
| D161YFW        | CAA ACC GAC CGA TTA TAT CGT CTT GAT GG     |
| D161YREV       | CCA TCA AGA CGA TAT AAT CGG TCG GTT TG     |
| <b>BRD4(1)</b> |                                            |
| A89V FW        | GCA GCC TGT GGA TGT CGT CAA GCT GAA CC     |
| A89V REV       | GGT TCA GCT TGA CGA CAT CCA CAG GCT GC     |
| <b>BRD2(2)</b> |                                            |
| R419W FW       | GCG GCG GAT GTA TGG CTC ATG TTT TCG        |
| R419W REV      | CGA AAA CAT GAG CCA TAC ATC CGC CGC        |
| Q443H FW       | GGC ACG AAA GCT ACA CGA TGT ATT TGA G      |
| Q443H REV      | CTC AAA TAC ATC GTG TAG CTT TCG TGC C      |
| <b>BRD3(2)</b> |                                            |
| H395R FW       | AAT CCC CCA GAC CGC GAG GTT GTG GCC AT     |
| H395R REV      | ATG GCC ACA ACC TCG CGG TCT GGG GGA        |
| <b>BRD4(2)</b> |                                            |
| A420D FW       | CAG GAG TTT GGT GAT GAC GTC CGA TTG        |
| A420D REV      | CAA TCG GAC GTC ATC ACC AAA CTC CTG        |

---
